# Supplementary material for: Opening Space for Plastics—Why Spatial, Soil and Land Use Data Are Important to Understand Global Soil (Micro)Plastic Pollution
Source: MDPI journal article supplement (doi:10.3390/microplastics1040042), 2022-10-08
Supplement: s1 [file s1]

## Supplementary Material

# Opening Space for Plastics—Using Soil Science to Understand (micro-)Plastic Pollution

Collin J. Weber \* and Moritz Bigalke

Department of Soil Mineralogy and Soil Chemistry, Institute for Applied Geosciences,  
Technical University of Darmstadt, Schnitzspahnstraße 9, 64287 Darmstadt; Germany

\* Correspondance: collin.weber@tu-darmstadt.de

### Contents:

**Table S1** Definitions of selected questions and for categorized responses from the applied questionnaire (SI page 2)

**Table S2** Recommendation on basic spatial positioning and soil data for MP research together with easy access pathways and global dataset examples (SI page 3–4)

**Table S1.** Definitions of selected questions and for categorized responses from the applied questionnaire.

| ID  | Requested information    | Question definition                                                                                                                                                                                                                                       | Categorized answers definition |                                                                                                                                                                                   |
|-----|--------------------------|-----------------------------------------------------------------------------------------------------------------------------------------------------------------------------------------------------------------------------------------------------------|--------------------------------|-----------------------------------------------------------------------------------------------------------------------------------------------------------------------------------|
| 2-3 | Single location          | The term "single location" refers to a sampling conducted on a spatially confined unit, which is clearly separated from other areas (e.g., single arable field, single sampling point).                                                                   |                                |                                                                                                                                                                                   |
| 2-6 | Map                      | The question asks about the availability of a geographical map illustration in the respective publication, independent of the object depicted (e.g., topographic map, soil map).                                                                          |                                |                                                                                                                                                                                   |
| 3-6 | Depth sampling according | The questions ask about the method how depth samples were subdivided: Either by soil horizons (e.g., A, B horizon boundary) or metric depth intervals                                                                                                     | horizon                        | Depth sampling according soil horizons: Boundaries between different depth samples according soil horizon boundaries                                                              |
|     |                          |                                                                                                                                                                                                                                                           | depth                          | Depth sampling according metric depth values: boundaries between different depth samples according fixed depth levels                                                             |
| 3-8 | Lateral sampling scale   | The term "lateral sampling scale" refers to the spatial scale covered by the sampling and ranges from the consideration of individual points to several points in a larger spatial unit (e.g., nation)                                                    | single                         | Sampling of a single soil sample or soil profile (including several depth samples possible)                                                                                       |
|     |                          |                                                                                                                                                                                                                                                           | local                          | Sampling of an undefined number of soil samples or soil profiles on a confident spatial unit (e.g., single arable field)                                                          |
|     |                          |                                                                                                                                                                                                                                                           | regional                       | Sampling of an undefined number of soil samples or soil profiles in a wider spatial unit, but limited to regional spatial boundaries (e.g., a landscape unit, a political region) |
|     |                          |                                                                                                                                                                                                                                                           | superregional                  | Sampling of an undefined number of soil samples or soil profiles in a large-scale spatial unit, limited only by large-scale spatial boundaries (e.g., national borders)           |
| 3-9 | Systematic sampling      | The term "systematic sampling" asks for the implementation of a systematic, spatial sampling approach, which either follows a clear spatial pattern (e.g., grid sampling) or is based on predefined spatial criteria (e.g., distance from plastic source) |                                |                                                                                                                                                                                   |

**Table S2.** Recommendation on basic spatial positioning and soil data for MP research together with easy access pathways and global dataset examples<sup>1</sup>.

| Data class                    | Parameter         | Advantage for MP research                                                                                                                   | Data record                                                                              |                                                      | Data access or helpful tools examples <sup>1</sup>                                                                                                                                                         |
|-------------------------------|-------------------|---------------------------------------------------------------------------------------------------------------------------------------------|------------------------------------------------------------------------------------------|------------------------------------------------------|------------------------------------------------------------------------------------------------------------------------------------------------------------------------------------------------------------|
|                               |                   |                                                                                                                                             | Professional                                                                             | Easy access                                          |                                                                                                                                                                                                            |
| <b>Spatial reference data</b> | Coordinates       | For each sample point: clear spatial location, globally retrievable and usable for global databases                                         | <i>Global Positioning System (GPS) or Differential Global Positioning System (DGPS)</i>  | Smartphone GPS sensors                               | Easiest access for others through sharing geodata in common formats (e.g., kml, .shp, .txt)                                                                                                                |
|                               | Topographic maps  | For study area: Spatial impression of lateral contexts and possible local plastic sources in the surroundings                               | Geographic information system (GIS) software solutions                                   | Freely available online GIS tools                    | Google Earth (Software, Google LCC) QGIS.org, 2022. QGIS Geographic Information System. QGIS Association. <a href="http://www.qgis.org">http://www.qgis.org</a>                                            |
| <b>Soil context data</b>      | Land use          | For each sample point: Direct impression on local MP sources                                                                                | Field observation and classification                                                     | Field observation                                    | Buchhorn et al. (2020): Copernicus Global Land Service: Land Cover 100m: collection 3: epoch 2019: Globe <a href="https://lcviewer.vito.be/2015">https://lcviewer.vito.be/2015</a>                         |
|                               | Land use practice | Especially for agricultural land: information on agricultural MP sources                                                                    | Interview land owner                                                                     | Interview land owner                                 | -                                                                                                                                                                                                          |
|                               | Land use change   | Detection of past plastic sources and influences on soil structure (e.g., construction activities)                                          | Self-evaluation of satellite or aerial photo data                                        | Use of global land use change datasets               | Buchhorn et al. (2020): Copernicus Global Land Service: Land Cover 100m: collection 3: epoch 2019: Globe <a href="https://lcviewer.vito.be/2015">https://lcviewer.vito.be/2015</a>                         |
|                               | Soil type (name)  | Soil names provide a unique description of a soil, its major properties and soil forming processes each effecting MP retention and mobility | F <sup>2</sup> : Full soil survey according FAO (2006) and classification via WRB (2015) | Use of global soil data, regional or local soil maps | FAO (2022): Legacy Soil Maps and Soils Databases <a href="https://www.fao.org/soils-portal/data-hub/soil-maps-and-databases/en/">https://www.fao.org/soils-portal/data-hub/soil-maps-and-databases/en/</a> |

<sup>1</sup> Examples for usable global datasets or free technical tools; <sup>2</sup> Field work; <sup>3</sup> Lab work; <sup>4</sup> Soil organic matter

| Data class           | Parameter        | Advantage for MP research                                                                                                                        | Data record                                                                    |                                                      | Data access or helpful tools examples <sup>1</sup>                                                                                                                                                                                                                                                                 |
|----------------------|------------------|--------------------------------------------------------------------------------------------------------------------------------------------------|--------------------------------------------------------------------------------|------------------------------------------------------|--------------------------------------------------------------------------------------------------------------------------------------------------------------------------------------------------------------------------------------------------------------------------------------------------------------------|
|                      |                  |                                                                                                                                                  | Professional                                                                   | Easy access                                          |                                                                                                                                                                                                                                                                                                                    |
| Additional soil data | Texture          | Basic information on physical soil properties with regard to MP displacement processes. Indication of soil pore space and possible MP transport. | F <sup>2</sup> : Finger test (FAO, 20016)<br>L <sup>3</sup> : Texture analysis | Use of global soil data, regional or local soil maps | ISRIC World Soil Information:<br><br>WISE - Global Soil Profile Data, version 3.1<br><a href="https://data.isric.org/geonetwork/srv/eng/catalog.search#/metadata/a351682c-330a-4995-a5a1-57ad160e621c">https://data.isric.org/geonetwork/srv/eng/catalog.search#/metadata/a351682c-330a-4995-a5a1-57ad160e621c</a> |
|                      | pH               | Information on the pH milieu concerning the activity of soil organisms (e.g. earthworms) and the associated MP shift through bioturbation.       | F: Soil sampling,<br>L: measurement (pH meters)                                | Use of global soil data                              | SoilGrids — global gridded soil information<br><a href="https://soilgrids.org/">https://soilgrids.org/</a>                                                                                                                                                                                                         |
|                      | SOM <sup>4</sup> | Information on the SOM content regarding the proportion of organic substances and consequences for MP analysis                                   | F: Soil color (Munsell soil color charts)                                      | Use of global soil data                              |                                                                                                                                                                                                                                                                                                                    |

<sup>1</sup> Examples for usable global datasets or free technical tools; <sup>2</sup> Field work; <sup>3</sup> Lab work; <sup>4</sup> Soil organic matter
